# Anti-Transforming Growth Factor $\beta$ Antibody Treatment Rescues Bone Loss and Prevents Breast Cancer Metastasis to Bone

Swati Biswas<sup>1,5\*</sup>, Jeffrey S. Nyman<sup>3</sup>, JoAnn Alvarez<sup>6</sup>, Anwesa Chakrabarti<sup>2</sup>, Austin Ayres<sup>2</sup>, Julie Sterling<sup>2</sup>, James Edwards<sup>2</sup>, Tapasi Rana<sup>1</sup>, Rachelle Johnson<sup>2</sup>, Daniel S. Perrien<sup>2,3,4</sup>, Scott Lonning<sup>7</sup>, Yu Shyr<sup>6</sup>, Lynn M. Matrisian<sup>5</sup>, Gregory R. Mundy<sup>2,5</sup>

**1** Department of Radiation Oncology, Vanderbilt University School of Medicine, Nashville, Tennessee, United States of America, **2** Center for Bone Biology, Vanderbilt University School of Medicine, Nashville, Tennessee, United States of America, **3** Department of Orthopedics, Vanderbilt University School of Medicine, Nashville, Tennessee, United States of America, **4** Vanderbilt University Institute of Imaging Science, Vanderbilt University School of Medicine, Nashville, Tennessee, United States of America, **5** Department of Cancer Biology, Vanderbilt University School of Medicine, Nashville, Tennessee, United States of America, **6** Department of Biostatistics, Vanderbilt University School of Medicine, Nashville, Tennessee, United States of America, **7** Genzyme Corporation, Framingham, Massachusetts, United States of America

## Abstract

Breast cancer often metastasizes to bone causing osteolytic bone resorption which releases active TGF $\beta$ . Because TGF $\beta$  favors progression of breast cancer metastasis to bone, we hypothesized that treatment using anti-TGF $\beta$  antibody may reduce tumor burden and rescue tumor-associated bone loss in metastatic breast cancer. In this study we have tested the efficacy of an anti-TGF $\beta$  antibody 1D11 preventing breast cancer bone metastasis. We have used two preclinical breast cancer bone metastasis models, in which either human breast cancer cells or murine mammary tumor cells were injected in host mice via left cardiac ventricle. Using several *in vivo*, *in vitro* and *ex vivo* assays, we have demonstrated that anti-TGF $\beta$  antibody treatment have significantly reduced tumor burden in the bone along with a statistically significant threefold reduction in osteolytic lesion number and tenfold reduction in osteolytic lesion area. A decrease in osteoclast numbers ( $p=0.027$ ) *in vivo* and osteoclastogenesis *ex vivo* were also observed. Most importantly, in tumor-bearing mice, anti-TGF $\beta$  treatment resulted in a twofold increase in bone volume ( $p<0.01$ ). In addition, treatment with anti-TGF $\beta$  antibody increased the mineral-to-collagen ratio *in vivo*, a reflection of improved tissue level properties. Moreover, anti-TGF $\beta$  antibody directly increased mineralized matrix formation in calverial osteoblast ( $p=0.005$ ), suggesting a direct beneficial role of anti-TGF $\beta$  antibody treatment on osteoblasts. Data presented here demonstrate that anti-TGF $\beta$  treatment may offer a novel therapeutic option for tumor-induced bone disease and has the dual potential for simultaneously decreasing tumor burden and rescue bone loss in breast cancer to bone metastases. This approach of intervention has the potential to reduce skeletal related events (SREs) in breast cancer survivors.

**Citation:** Biswas S, Nyman JS, Alvarez J, Chakrabarti A, Ayres A, et al. (2011) Anti-Transforming Growth Factor  $\beta$  Antibody Treatment Rescues Bone Loss and Prevents Breast Cancer Metastasis to Bone. PLoS ONE 6(11): e27090. doi:10.1371/journal.pone.0027090

**Editor:** Michael P. Bachmann, Carl-Gustav Carus Technical University-Dresden, Germany

**Received:** July 26, 2011; **Accepted:** October 10, 2011; **Published:** November 11, 2011

**Copyright:** © 2011 Biswas et al. This is an open-access article distributed under the terms of the Creative Commons Attribution License, which permits unrestricted use, distribution, and reproduction in any medium, provided the original author and source are credited.

**Funding:** The work presented here has been funded by the PO1 CA040035 (NIH) grants awarded to the late Dr. Gregory R. Mundy (current PIs Matrisian and Elefteriou), U54 CA126505 (NIH) awarded to Dr. Lynn Matrisian (Dr. Mundy, project leader), and the Vanderbilt Breast Spore Program (NCI) awarded to Dr. Carlos Arteaga. Dr. Biswas was a BIRCWH fellow (2007–2010) whose work was supported by the Building Interdisciplinary Research Careers in Women's Health (BIRCWH) career development award (NIH). The funders had no role in study design, data collection and analysis, decision to publish, or preparation of the manuscript. Genzyme has provided us with the anti-TGF beta antibody and was involved in study design as a follow up of their preliminary finding with this antibody. They have not taken part in acquiring or analyzing the data presented here.

**Competing Interests:** Scott Lonning is an employee of Genzyme Corporation who provided us with the anti-TGF beta antibody. There are no patents, products in development or marketed products to declare. This does not alter the authors' adherence to all the PLoS ONE policies on sharing data and materials, as detailed online in the guide for authors.

\* E-mail: swati.biswas@vanderbilt.edu

## Introduction

Breast cancer remains the second leading cause of cancer-related death among women, although in recent years there has been significant advancement in terms of treatment and prevention. This disease poses a serious threat due to the high incidence of metastasis to other organs, such as lung and bone. More than 75% of patients with breast cancer develop osteolytic bone metastasis, leading to tremendous bone loss [1], [2], [3], [4] and resulting in a significant burden on health care cost and poor quality of life for patients. Although currently used anti-resorptive

therapies, such as bisphosphonates and denosumab, are successful in reducing further osteolysis, they cannot improve the existing damage in the residual bone [5], [6], [7], [8], [9], [10], [11]. Therefore, the surviving population remains prone to a high risk of skeletal-related events (SREs), such as pathological fracture, spinal cord compression, bone pain and hypocalcaemia [12], [13]. To address this issue, new therapeutic approaches to rescue cancer-induced bone loss are urgently required [14], [15].

Therapeutic approaches involving anti-TGF $\beta$  present an obvious choice in the rescue of cancer-induced bone loss for several reasons. Bone is the largest reservoir of TGF $\beta$  in the body

and one of the major osteogenic cytokines. Both bone mass and bone matrix properties are regulated by TGF $\beta$  [16] and genetic manipulation of this pathway has been shown to affect bone mass in several murine models [17], [18], [19], [20]. Normal bone remodeling requires a balance between bone resorption and bone formation. However, in cancer-induced bone disease normal remodeling is interrupted. During the progression of osteolytic breast cancers, an increase in the osteoclastic bone resorption takes place. As a result, an excess of active TGF $\beta$  is secreted in the bone microenvironment, which in turn mediates a cascade of events that favor the vicious cycle of bone metastasis [21]. Although TGF $\beta$  is growth inhibitory for normal epithelial cells, it plays a favorable role in late tumor progression [22]. It has been demonstrated that active TGF $\beta$  signaling is needed for the establishment of bone metastasis [23]. This is in agreement with a study reporting higher plasma levels of TGF $\beta$  associated with poor prognosis in breast cancer patients [24]. Upon reaching the bone microenvironment, tumor cells are exposed to several growth factors including TGF $\beta$  which leads to upregulation of Gli2, a hedgehog family transcription factor. In osteolytic breast cancer cells, Gli2 has been shown to regulate the expression of parathyroid hormone related protein (PTHrP), a major osteolytic factor [25]. Intact TGF $\beta$  signaling in the breast cancer cells is necessary for the PTHrP secretion, suggesting a direct mechanistic link between TGF $\beta$  and tumor-induced osteolytic bone destruction [23]. In addition to promoting the growth of cancer cells in bone, TGF $\beta$  increases osteoclast differentiation [26], [27] and suppresses osteoblast differentiation [28]. All of these events contribute to the accelerated bone destruction in the tumor-infested bone, in a TGF $\beta$ -dependent manner. Increased TGF $\beta$  production in mice has been implicated in bone fragility and osteoporosis [18], suggesting that blockade of excess TGF $\beta$  may rescue bone loss. Therefore, anti-TGF $\beta$  antibody seems a logical approach to rescue bone loss.

Several attempts have been made to develop anti-cancer therapies involving an anti-TGF $\beta$  approach. Despite the predictable side effects, a number of anti-TGF $\beta$  compounds have been shown to inhibit primary and metastatic cancer and are in preclinical or clinical trials [29]. In a mouse model of bone cancer, blockade of TGF $\beta$  signaling in breast cancer cells has been shown to inhibit breast cancer to bone metastasis [23]. Yang et al. reported that lifelong treatment with a soluble TGF $\beta$  receptor II protects mice against metastasis [30]. A study using 4T1 mouse mammary cancer cells indicated that blocking TGF $\beta$  signaling systemically reduces metastatic events [31]. Small-molecule inhibitors of transforming growth factor  $\beta$  receptor I (T $\beta$ R1) have been shown to reduce tumor burden in preclinical models of breast cancer bone metastasis and pulmonary metastasis [32]. Mohammad et al have recently shown that a small molecule inhibitor of TGF $\beta$  was able to inhibit melanoma bone disease in a preclinical model [33]. Whether these approaches also improve breast cancer-induced bone loss has not yet been reported.

Recently, a small molecule inhibitor of T $\beta$ R1 kinase was shown to have anabolic and anti-catabolic effects on normal bone formation [34]. In addition, our group recently reported that the anti-TGF $\beta$  antibody has the potential to increase bone volume in normal mice [35]. These results prompted us to test the efficacy of anti-TGF $\beta$  antibody in preventing cancer-induced bone disease.

To investigate the effect of anti-TGF $\beta$  antibody on both tumor burden and bone loss, we obtained a pan-TGF $\beta$  antibody from Genzyme Corporation that blocks all three isoforms of TGF $\beta$ . Our *in vivo* results show that an anti-TGF $\beta$  antibody (1D11) significantly increased bone mineral density (BMD), trabecular thickness and bone volume, along with significant reduction in

tumor burden and osteolytic bone damage in preclinical breast cancer bone metastasis models using both human and murine breast cancer cell lines. *In vitro*, 1D11 was able to block TGF $\beta$  induced expression of both Gli2 and PTHrP, which provides a mechanistic explanation of reduced tumor burden in our model. To our knowledge, this is the first demonstration of dual efficacy of an anti-TGF $\beta$  antibody to both inhibit tumor burden and rescue bone loss in a breast cancer to bone metastasis model [33].

## Materials and Methods

### Animals

All procedures were performed with the approval of the Vanderbilt University Institutional Animal Care and Use Committee and in accordance with Federal guidelines. For all *in vivo* experiments, 4- to 5-week-old female athymic nude mice (for MDA-MB-231 human breast cancer cells) or Balb/C mice (for 4T1 mouse mammary tumor cells) were used.

### Study design

Both the anti-TGF $\beta$  (1D11) and control antibody (13C4), directed against Shigella toxin, were obtained from Genzyme Corporation, MA. To test the efficacy of anti-TGF $\beta$  antibody 1D11 in the inhibition of bone metastases, we used preclinical models of breast cancer to bone metastases. Mice were inoculated with breast tumor cells into the left cardiac ventricle and were treated with either anti-TGF $\beta$  antibody (1D11, 10 mg/kg body weight) or control antibody (13C4, 10 mg/kg body weight), starting either one day after tumor cell inoculation (the adjuvant, or metastasis prevention regimen) or 2 weeks after tumor cell inoculation (the established metastasis regimen); in both regimens, treatment frequency was 3 days per week and continued until 4 weeks after tumor cell inoculation. Any mice showing the sign of distress before this period was sacrificed immediately. 1D11 is a murine monoclonal antibody which is able to neutralize all three isoforms of TGF $\beta$  *in vitro* [36] and *in vivo* [36], [37], [38]. This antibody only recognizes the active form of the cytokine. The vehicle used for preparing the antibodies showed no significant difference in the tumor burden in comparison to the control-antibody-treated group during initial experiments and was therefore excluded from these studies (communication with Genzyme Corporation). The outcome measures included quantification of osteolytic bone destruction using X-ray and histology. Additionally, trabecular bone volume and architecture were measured using microCT. Bone quality parameters were measured using Confocal Raman spectroscopy. Tumor burden and osteoclast numbers were quantified by means of histology.

### Cell culture

The human cancer cell line MDA-MB-231 was obtained from ATCC (American Type Culture Collection), and a bone metastatic variant generated and reported previously by our group [39] was used for all *in vitro* and *in vivo* studies. The murine mammary cell line 4T1 had previously been obtained from another investigator [40] and used in a cardiac injection model within our group [41]. Both cell lines were maintained in DMEM (Invitrogen, Carlsbad, CA) containing 10% Fetal Bovine Serum (FBS: Hyclone Laboratories, Logan, UT) and 1% penicillin/streptomycin (Mediatech). Cells were cultured in a 37°C atmosphere of 5% CO<sub>2</sub> and 95% O<sub>2</sub> using standard tissue culture techniques.

### Intracardiac bone metastasis model

MDA-MB-231 or 4T1 cells were trypsinized, washed and then resuspended in ice-cold sterile PBS at a final concentration of

$1 \times 10^6$ /ml. Four- to 5-week-old female nude (for MDA-MB-231 cell injection) or Balb/C (for 4T1 cell injection) mice were anesthetized using a ketamine/xylazine mixture. Mice were positioned ventral side up, and tumor cells were injected into the left cardiac ventricle using a percutaneous approach with a 27-gauge needle attached to a 1 ml syringe, as described previously [42], [23]. Correct injection position in the left ventricle was confirmed by the appearance of bright red blood at the hub of the needle in a pulsatile fashion. Each mouse received  $1 \times 10^5$  cells in a 100- $\mu$ l volume (resuspended in PBS) which was injected slowly over 1 minute. For the adjuvant, or metastasis prevention regimen, mice were treated starting 1 day after tumor cell inoculation. For established metastasis protocol, mice were imaged until visible lesion detection (approximately two weeks) and treatment was started at that point and was continued for another two weeks. All mice were imaged weekly and sacrificed 4 weeks post-tumor inoculation. Any mice showing signs of distress prior to 4 weeks were sacrificed immediately.

### Radiographic analysis of bone lesions

Beginning 1 week after tumor cell inoculation, tumor-bearing animals were subjected to radiographic imaging. In brief, mice were sedated using ketamine/xylazine and placed in a prone position. X-ray images were then taken at 35 kVp for 8 s using a digital radiography system (Faxitron LX-60). Images were saved and lesion area and lesion numbers were evaluated using image analysis software (Metamorph, Molecular Devices, Inc.). Data presented are the average of lesion area and lesion numbers per mouse in each treatment group.

### Bone histology and histomorphometry

After sacrifice, hind limbs (tibiae and femora) from each mouse were harvested, fixed in 10% neutral-buffered formalin (Fisher Scientific) for 48 h and stored in 70% ethanol for further processing. Following microCT analysis, the tibiae and femora were decalcified in 10% EDTA for two weeks and embedded in paraffin using an automated tissue processor for histological analysis. Mid-sagittal sections (5  $\mu$ m) of tibiae or femora were stained with hematoxylin, orange G (Sigma) and phloxine B (Sigma). Separate sections were also stained for TRAP activity for visualization of osteoclasts. Histomorphometric analysis of tumor burden, osteoclast numbers and osteoblast numbers was conducted on digital micrographs (100 $\times$ ) using an image quantification software (Metamorph, Molecular Devices, Inc) software. Tumor burden, defined as area occupied by tumor within the medullary region, was calculated. Osteoclasts numbers per area of trabecular bone surface was measured in a blinded fashion in the TRAP stained mid section of long bones using Metamorph software.

### Quantitative microCT

MicroCT analysis was performed in the Vanderbilt University Institute of Small Animal Imaging. To assess the effect of anti-TGF $\beta$  treatment on the architecture and structure of bone in tumor bearing mice, long bones were used. Micro-computed X-ray tomography (MicroCT) was used to measure trabecular bone volume within the metaphysis of the tibia and trabecular bone volume, architecture and density in the metaphysis of the femur. The long axis of each specimen was aligned with the scanning axis. One hundred slices from the proximal tibia were scanned at a 12- $\mu$ m resolution ( $\mu$ CT40 Scanco Medical, Switzerland). The region of interest was trabeculae within the proximal metaphysis of the tibia (0.24 to 1.20 mm) below the growth plate. Images were acquired using 55 kV, 114  $\mu$ A, 300-ms integration, and 500 projections per

180 $^\circ$  rotation. Contiguous cross sectional images of the entire metaphyseal region were acquired. Following reconstruction, the bone tissue was segmented from air or soft tissue using a threshold of 270 per thousand (or 438.7 mgHA/cm $^3$ ), a Gaussian noise filter of 0.8 and support of 2. Standard architectural characteristics such as trabecular bone volume (BV/TV), trabecular thickness (Tb.Th\*), trabecular number (Tb.N\*), connectivity density (Conn.D) and mean volumetric density of the mineralized tissue (Tb.TMD or mBMD) were calculated using the Scanco evaluation software.

### Raman micro-Spectroscopy

To determine whether neutralizing TGF $\beta$  in the tumor-bone microenvironment affected composition at the tissue level, we collected Raman spectra from the cortex of the tibial metaphysis. Chemical bonds naturally absorb a small amount of energy from a laser photon as they vibrate (known as Raman scattering of light). In Raman spectroscopy, the spectrum of reflected light (shift in wave number) is collected after the laser excites the bonds in a tissue at a given wavelength, which for these purposes is near-infrared (785 nm). This spectrum then characterizes the physio-chemical properties of the tissue. Using the confocal Raman microscope (Renishaw Inc., Ramanscope Mark III) with a spatial resolution of 2–5  $\mu$ m and a spectral resolution of 1 cm $^{-1}$ , we acquired nine spectra from polished sections of embedded tibia (~150  $\mu$ m below growth plate) and quantified the intensities of key peaks related to mineral ( $\nu_1$  phosphate and Type-B carbonate) and collagen (proline ring). Thus, mineral-to-collagen ratio, type-B carbonate substitution and crystallinity were the averages of  $\nu_1$  phosphate/proline,  $\nu_1$  phosphate/carbonate, and the inverse of the full width at half the maximum of  $\nu_1$  phosphate per bone.

### Osteoclastogenesis assay

Mouse long bones were flushed with PBS, resuspended by pipeting, and strained through a cell strainer (BD Biosciences, 40  $\mu$ m). Mononuclear cells were isolated from resuspended bone marrow using Histopaque 1077 (Sigma), following manufacturers' instructions. Cells were plated in alpha-MEM media supplemented with 10% fetal bovine serum, RANKL (100 ng/ml) and MCSF (30 ng/ml) to support osteoclast formation. Both reagents were obtained from R&D systems. Two treatment groups were used, one treated with isotype antibody (13C4, 25  $\mu$ g/ml) and other treated with anti-TGF $\beta$  antibody (1D11, 25  $\mu$ g/ml). TRAP staining was performed using Leukocyte Acid Phosphatase kit (Sigma) and number of osteoclasts per field was counted under microscope.

### Osteoblast differentiation assay

Primary cultures of calvarial osteoblasts were prepared using a modified sequential collagenase/trypsin digestion method [43]. Briefly, calvaria were removed from 3- to 4-day-old C57Black 6 mice, cleaned free from soft tissue, washed for 10 min with PBS containing 0.025% trypsin, and digested with type-IV Collagenase p (1 mg/ml; source: *Clostridium histolyticum*, Roche) and 0.025% trypsin for 30 min at 37 $^\circ$ C in HBSS with gentle agitation. The procedure was repeated twice, with a 1-h digestion followed by a 30-min digestion using above mentioned concentration of collagenase p and trypsin. The cells from the second and third digestions were collected and centrifuged at 2500 $\times$ g for 10 min. The supernatant was aspirated and discarded, and the pellet was resuspended in alpha-MEM containing 10% fetal bovine serum. The culture was kept undisturbed for at least 2 days. At confluence, cells were trypsinized using the standard procedure and plated in 24 well plates for osteoblast differentiation assay. Cells were cultured in alpha-MEM containing 2.5% fetal bovine

serum for a further 3 weeks in the presence of 5 mM beta glycerophosphate (Sigma) and 100  $\mu$ g/ml L-ascorbic acid (Sigma) either in the presence of isotype control antibody (13C4, 25  $\mu$ g/ml) or anti-TGF $\beta$  antibody (1D11, 25  $\mu$ g/ml). 6 wells were dedicated to each treatment group. Media containing ascorbic acid and beta glycerophosphate was changed every 2 days until mineralized nodules (approximately 15–28 days) were formed. Mineralized matrix formation was detected by means of Von Kossa staining and quantified using Metamorph image analysis software.

### Co-culture assay

*Ex vivo* co-culture assay was done using mouse calverial osteoblasts and adult mouse bone marrow mononuclear cells. Calverial osteoblasts were isolated from 3–4 days old pups following the method described previously [43] and cultured in 6 well tissue culture plates until confluent. After these cells were confluent, bone marrow mononuclear cells were isolated from normal mice and plated on top of the osteoblast layer. The co-culture system was treated with either control antibody (13C4, 25  $\mu$ g/ml) or anti-TGF $\beta$  antibody (1D11, 25  $\mu$ g/ml) every other day for 7–10 days. Cells were fixed and stained for assessment of mature osteoclasts formation using Leucocyte Acid Phosphatase kit (Sigma) according to manufacturer's instruction and mature osteoclasts (red) were scored using microscope.

### Quantitative real-time PCR

Total RNA was extracted using RNeasy Mini Kit (QIAGEN) according to the manufacturer's instruction. cDNA was synthesized using SuperScript III First-Strand Synthesis System for RT-PCR (Invitrogen) and random hexamers from 2  $\mu$ g of total RNA per manufacturer's instructions. cDNA (2  $\mu$ g) was used for quantitative real-time PCR using the Real MasterMix (Eppendorf, Hamburg, Germany) and 0.5  $\mu$ L of prepared cDNA per manufacturer's instructions. Real-time PCR was done in triplicate using the Real Plex Machine (Eppendorf) with the following cycling conditions: 95°C for 15 seconds, 58°C for 30 seconds, and 68°C for 30 seconds. Normalization was done using 18S as an internal control.

### Statistical Considerations

The data are presented using box plots showing the quartiles along with the raw data, plotted separately for each group and for each outcome. Wilcoxon rank-sum tests and Kruskal-Wallis tests were used to test the null hypotheses of no difference in the distribution of the outcomes among the treatment groups. All analyses were performed using R version 2.11.1. *In vivo* results presented are from the 4 week treatments; however, the two week treatment showed similar outcome.

## Results

### Anti-TGF $\beta$ antibody treatment reduces tumor burden in bone

Using two preclinical mouse models of breast cancer to bone metastases, we have assessed the efficacy of the anti-TGF $\beta$  antibody 1D11 in reducing tumor burden. Female nude mice (4 weeks old) were inoculated with MDA-MB-231 cells via the intracardiac route. Mice were treated with either control antibody (13C4) or anti-TGF $\beta$  antibody (1D11), either from one day after tumor cell inoculation (the adjuvant, or metastasis prevention regimen) or 2 weeks after tumor cell inoculation (the established metastases regimen), as described in the Materials and methods section. Following 4-weeks of treatment, anti-TGF $\beta$  treatment

significantly reduced the tumor burden in the long bones ( $p$  value = 0.001; Figure 1b) and only microscopic small foci of tumor cells were observed in most mice treated with 1D11 (Figure 1a, white line indicates area occupied by tumor). Following 2-weeks treatment (established metastases protocol), a similar but less dramatic effect was observed ( $p$  value = 0.016; Figure 1c).

To test whether this treatment was effective in other bone metastases models, female Balb/C mice was inoculated with 4T1 murine mammary breast cancer cells and mice were treated one day after tumor cell inoculation and continued to be treated for 4 weeks. Tumor burden was significantly reduced in mice treated with anti-TGF $\beta$  antibody compared to the isotype control group ( $p$  = 0.03, Figure 1d).

### Anti-TGF $\beta$ antibody reduced PTHrP and Gli2 expression in breast cancer cells

It has been reported that TGF $\beta$  can upregulate the expression of Gli2, a hedgehog signaling molecule which is one of the driving factors of osteolytic bone metastasis, we have tested whether treatment with 1D11 might suppress Gli2 expression. As anticipated, TGF $\beta$ -induced expression of Gli2 was decreased when MDA-MB-231 tumor cells were treated with 1D11 (Wilcoxon rank-sum  $p$ -value for TGF $\beta$  versus TGF $\beta$  and 1D11 is 0.005) (Figure 1e). This might be one of the mechanisms by which anti-TGF $\beta$  antibody 1D11 inhibited osteolytic bone damage in our model. Gli2 is also known to increase the secretion of parathyroid hormone-related protein (PTHrP), another major osteolytic factors, in a TGF $\beta$  dependent process. Inhibition of PTHrP can prevent tumor induced bone destruction, therefore, we tested whether by neutralizing excess TGF $\beta$ , 1D11 may also decrease PTHrP expression in the tumor cells. Using real time PCR, we found that 1D11 significantly reduced TGF $\beta$ -induced expression of PTHrP in the MDA-MB-231 cells (Wilcoxon rank-sum  $p$ -value for TGF $\beta$  versus TGF $\beta$  and 1D11 is 0.005) (Figure 1f).

### Anti-TGF $\beta$ antibody treatment reduces osteolytic lesions in MDA-MB-231 cardiac injection model

Advanced metastatic breast cancer in patients leads to severe osteolytic damage. MDA-MB-231 cells injected via the left cardiac ventricle of female nude mice give rise to comparable metastatic lesions, which can be quantified using X-ray image analysis. Radiographic image analysis in MDA-MB-231 tumor-bearing mice treated with either control antibody (13C4, 10 mg/kg, Figure 2a, left panel, arrow indicating osteolytic damage) or anti-TGF $\beta$  antibody (1D11, 10 mg/kg, Figure 2a, right panel) has indicated that the average number of osteolytic lesions was reduced by more than three-fold (Figure 2b;  $p$ <0.001) and the average lesion area was reduced ten-fold in the anti-TGF $\beta$  treatment group when compared with control (Figure 2c;  $p$ <0.001).

### Anti-TGF $\beta$ antibody treatment reduces osteoclast numbers in tumor-bearing mice

Increased bone resorption in the tumor-bearing bone has been associated with increased osteoclast numbers. Since, X-ray imaging has revealed that treatment with anti-TGF $\beta$  antibody resulted in fewer osteolytic lesions and overall smaller osteolytic area, we have anticipated that, anti-TGF $\beta$  treatment may reduce number of osteoclasts *in vivo*. Mouse long bones from both control antibody and anti-TGF $\beta$  antibody treatment groups were stained with TRAP stain. As anticipated, histological analysis revealed that the number of TRAP-positive osteoclasts per millimeter of bone surface was significantly lower in the group treated with anti-

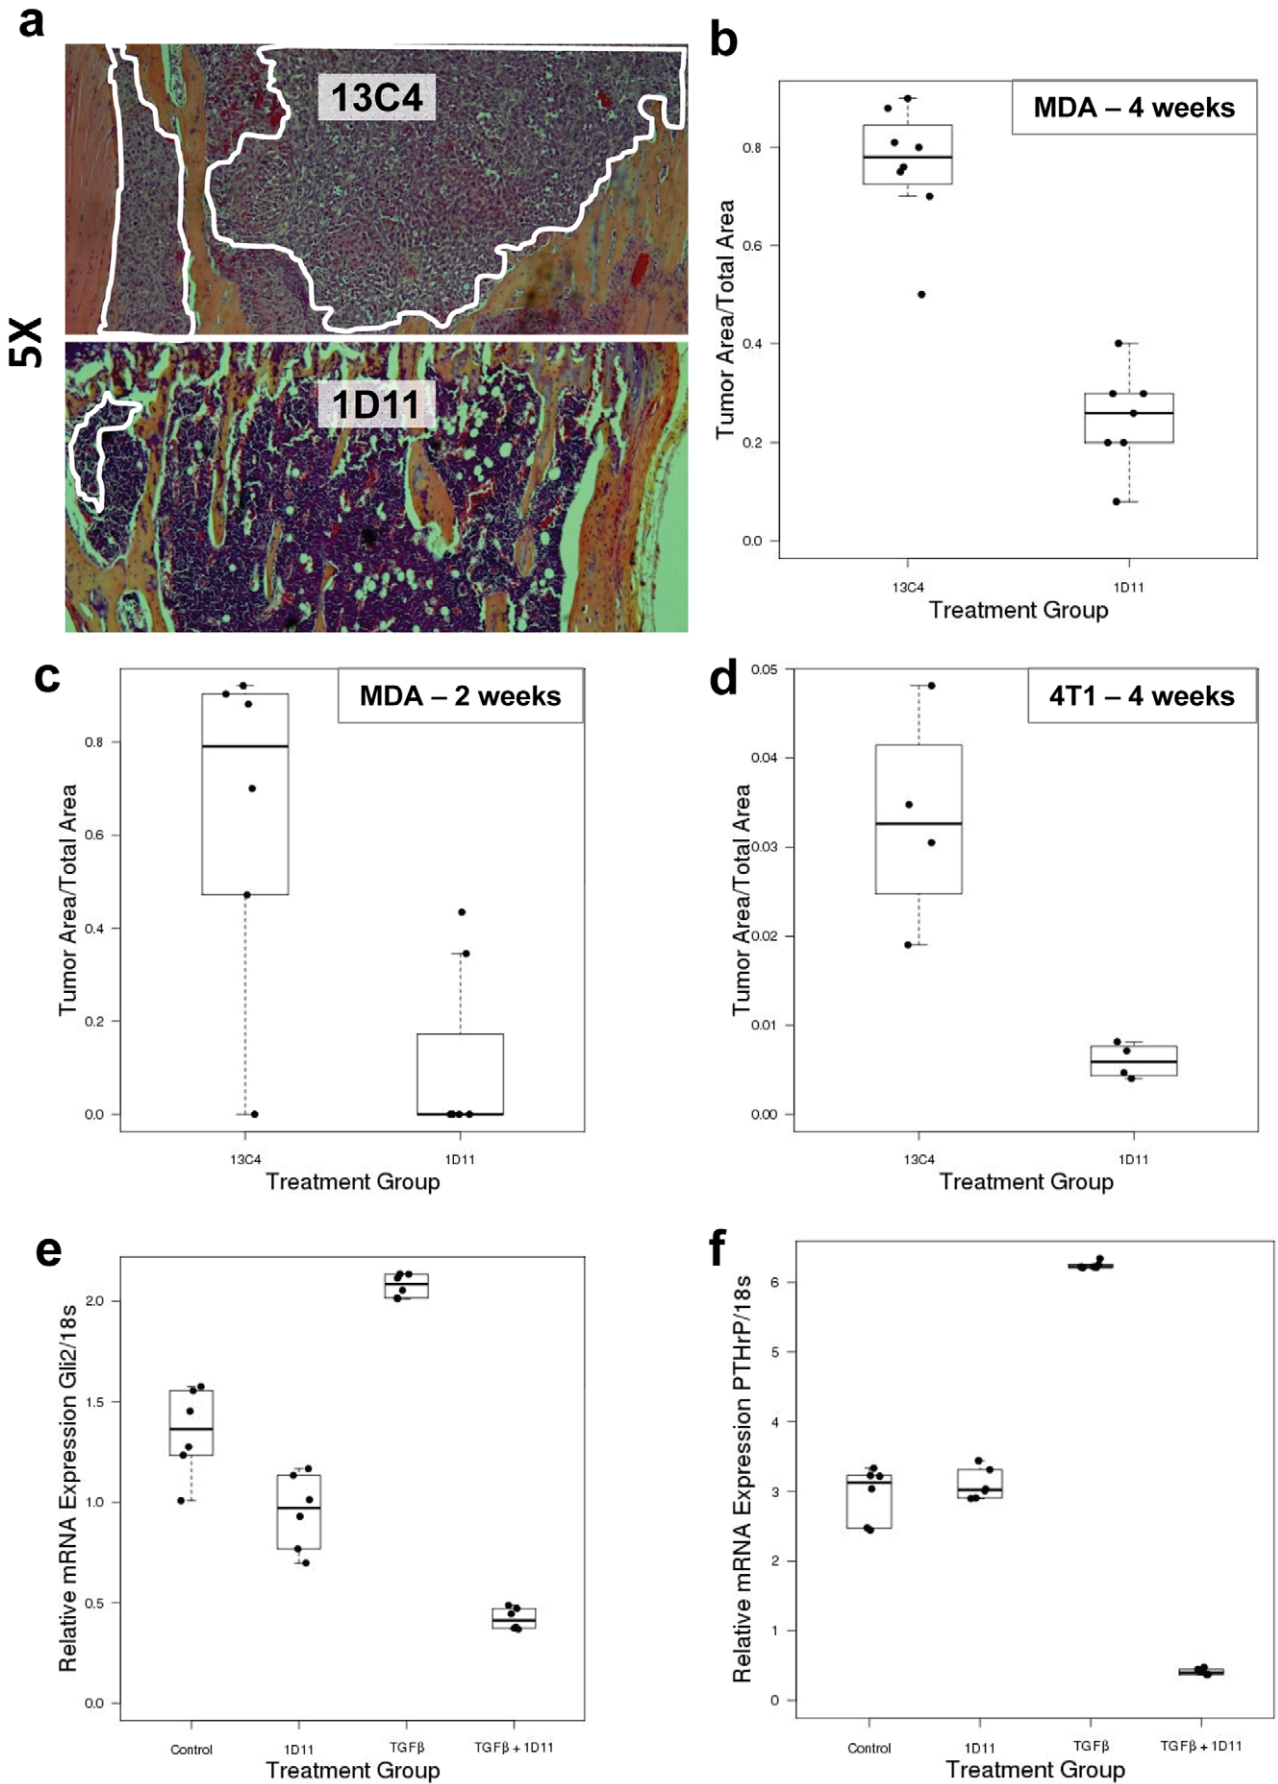

**Figure 1. Anti-TGF $\beta$  antibody treatment decreases tumor burden in tumor-bearing mice.** **Panel a:** Representative H&E sections (5 $\times$ ) of tibia from tumor-bearing mice treated with control antibody (13C4) or anti-TGF $\beta$  antibody (1D11). White line indicates the presence of tumor. **Panel b:** A boxplot of tumor burden in MDA-MB-231 tumor-bearing mice treated with either 13C4 (10 mg/kg) or 1D11(10 mg/kg) for 4 weeks, starting 1 day after tumor cell injection (N=at least 7) showing decrease in tumor burden. Wilcoxon rank-sum p-value=0.001. Mean  $\pm$  standard deviation=13C4: 0.76 $\pm$ 0.12, 1D11: 0.25 $\pm$ 0.1. **Panel c:** Boxplots of tumor burden in MDA-MB-231 tumor bearing mice treated with either 13C4(10 mg/kg) or 1D11(10 mg/kg) starting two weeks after tumor cell injection and continued to be treated until the end of 4 weeks post tumor injection. Wilcoxon rank-sum p-value=0.016. Mean  $\pm$  standard deviation=13C4:0.6461  $\pm$ 0.3599, 1D11: 0.1114 $\pm$ 0.1919. (N=at least 5). **Panel d:** Boxplot of tumor burden by group for the 4T1 tumor bearing mice (4T1 cells injected in Balb/c), treated 1 day post tumor cell injection and treated for 4 weeks shown decrease in tumor burden. Wilcoxon rank-sum p-value=0.03. Mean  $\pm$  standard deviation=13C4: 0.0331 $\pm$ 0.012, 1D11:0.006 $\pm$ 0.002 (N=4). **Panel e:** Decreased relative mRNA expression of Gli2 in MDA-MB-231 upon 1D11 treatment. Wilcoxon rank-sum p-value for TGF $\beta$  versus TGF $\beta$ +1D11 groups is 0.005. Mean  $\pm$  standard deviation=TGF $\beta$ : 2.08 $\pm$ 0.06, TGF $\beta$  + 1D11: 0.42 $\pm$ 0.05. Results presented here are representative of at least two independent experiments. **Panel f:** Decreased relative mRNA expression of PTHrP in MDA-MB-231 upon treatment with 1D11. Wilcoxon rank-sum p-value for TGF $\beta$  versus TGF $\beta$  + 1D11 groups is 0.005. Mean  $\pm$  standard deviation=TGF $\beta$ : 6.24 $\pm$ 0.05, TGF $\beta$  + 1D11: 0.41 $\pm$ 0.04. Results presented here are representative of at least two independent experiments. doi:10.1371/journal.pone.0027090.g001

TGF $\beta$  antibody (1D11) compared to the isotype control (13C4) (Figure 3a; p = 0.027).

Bone marrow microenvironment is a complex multicellular system. The differentiation of osteoclasts is also regulated by osteoblasts. Therefore, fewer osteoclasts *in vivo* may be a direct effect of the treatment on the osteoblast precursor cells (bone marrow mononuclear cells) or mediated via osteoblasts.

In an attempt to test the direct effect of anti-TGF $\beta$  treatment on osteoclastogenesis, mononuclear cells were isolated from mouse bone marrow and subjected to osteoclast differentiation, either in the presence control antibody (13C4) or anti-TGF $\beta$  antibody (1D11) (Figure 3b). As anticipated, TGF $\beta$  significantly increases the number of TRAP-positive osteoclasts and treatment with 1D11 significantly reduced TGF $\beta$ -mediated osteoclast formation (p = 0.024, compared between TGF $\beta$  versus TGF $\beta$  and 1D11 treatment).

By secreting both OPG and RANKL, osteoblasts maintain the homeostasis of osteoclasts in bone microenvironment [44], [45], [46], [47], [48]. Since TGF $\beta$  has also been reported to alter the RANKL/OPG ratio, we asked whether the TGF $\beta$  neutralizing antibody interfered with osteoblast-induced osteoclastogenesis. Mouse calvarial osteoblasts and mouse bone marrow mononuclear cells were co-cultured in the presence of the control antibody or anti-TGF $\beta$  antibody (3c, representative images. Arrow indicates presence of TRAP positive osteoclasts). The anti-TGF $\beta$  treatment resulted in almost fivefold reduction the number of osteoclasts (Figure 3d, Wilcoxon rank-sum p value = 0.006). The result of the *ex vivo* assay are in agreement with the *in vivo* data and reinforce the notion that TGF $\beta$  plays a critical role in tumor-induced bone resorption at least in part through the induction of osteoclastogenesis.

### Anti-TGF $\beta$ antibody treatment increases bone volume and improves bone architecture in breast cancer to bone metastasis

We have used either MDA-MB-231 cells and injected those in the left ventricle of nude mice or 4T1 cells and injected those in Balb/C mice for assessing the efficacy of anti-TGF $\beta$  treatment in cancer induced bone disease. Representative 3D images of mice tibiae from both 13C4 (left panel) and 1D11 (right panel) treatment groups are shown in figure 4a, from the experiment where MDA-MB-231 cells were injected in nude mice. MicroCT analysis of tibia from mice bearing MDA-MB-231 human breast cancer cells in bone following intra-cardiac injection demonstrated that a 4-week treatment with anti-TGF $\beta$  antibody 1D11 resulted in an approximately 5-fold increase in the overall bone volume when compared with the isotype control 13C4 treated group (Figure 4b; p<0.001). A similar but less dramatic effect was observed with murine 4T1 mammary cancer cells injected into

syngeneic Balb/C mice via intra-cardiac route (Figure 4c; p<0.036). Further analysis using quantitative microCT showed that treatment with 1D11 resulted in a greater number of trabeculae, in thicker trabeculae, and in higher connectivity density (lack of fenestrations) of the trabecular bone, suggesting that suppression of TGF $\beta$  improves trabecular architecture in the presence of a tumor (Table 1). However, bone mineral density (mBMD or Tb.TMD) of the trabeculae was unchanged.

### Anti-TGF $\beta$ antibody increases osteoblast differentiation *in vitro*

To investigate whether increased bone volume and improved architecture observed in anti-TGF $\beta$  antibody-treated animals are a reflection of increased osteoblast differentiation, an *ex vivo* osteoblast differentiation assay was performed. Mouse calvarial osteoblasts were isolated and cultured in presence of either isotype control (Figure 4d, top panel) or anti-TGF $\beta$  antibody (Figure 4d, bottom panel) as described in the Materials and Method section. As indicated by Von Kossa staining, upon treatment with anti-TGF $\beta$  antibody, mineralized matrix production in primary calvarial osteoblasts was increased by approximately 2-fold, when compared with isotype control antibody (Figure 4e, e; p = 0.005). This suggests anti-TGF $\beta$  antibody directly increases osteoblast differentiation, a parameter likely to contribute to the overall increase in bone mass.

### Anti-TGF $\beta$ antibody treatment increases mineral-to-collagen ratio in tumor-bearing animals

Confocal Raman Spectroscopy revealed that inhibiting TGF $\beta$  signaling with 1D11 increased the mineral-to-collagen ratio in the metaphyseal cortex of the tibia (Table 2). Of note, 1D11 did not affect the Type-B carbonate substitution, a measure of mineral distortion. Moreover, it did not affect crystallinity. This suggests that the suppression of TGF $\beta$  increased the rate of mineral accumulation in the organic matrix but not the structure of mineral crystals themselves. We anticipate this to be a reflection of improvement of osteoblastic activity with anti-TGF $\beta$  treatment.

## Discussion

Despite major advancement in the treatment and prevention of early stage breast cancers, a large number of patients remain at risk of developing painful osteolytic bone metastases [3]. Although current anti-resorptive therapies using bisphosphonates are successful in preventing further bone resorption, they cannot repair the previously damaged bone. This leaves the patients with a high risk of pathological fracture and an increased morbidity and mortality. Thus, there is an urgent need for therapies directed at rescuing bone loss. Anti-TGF $\beta$  antibodies have been reported to



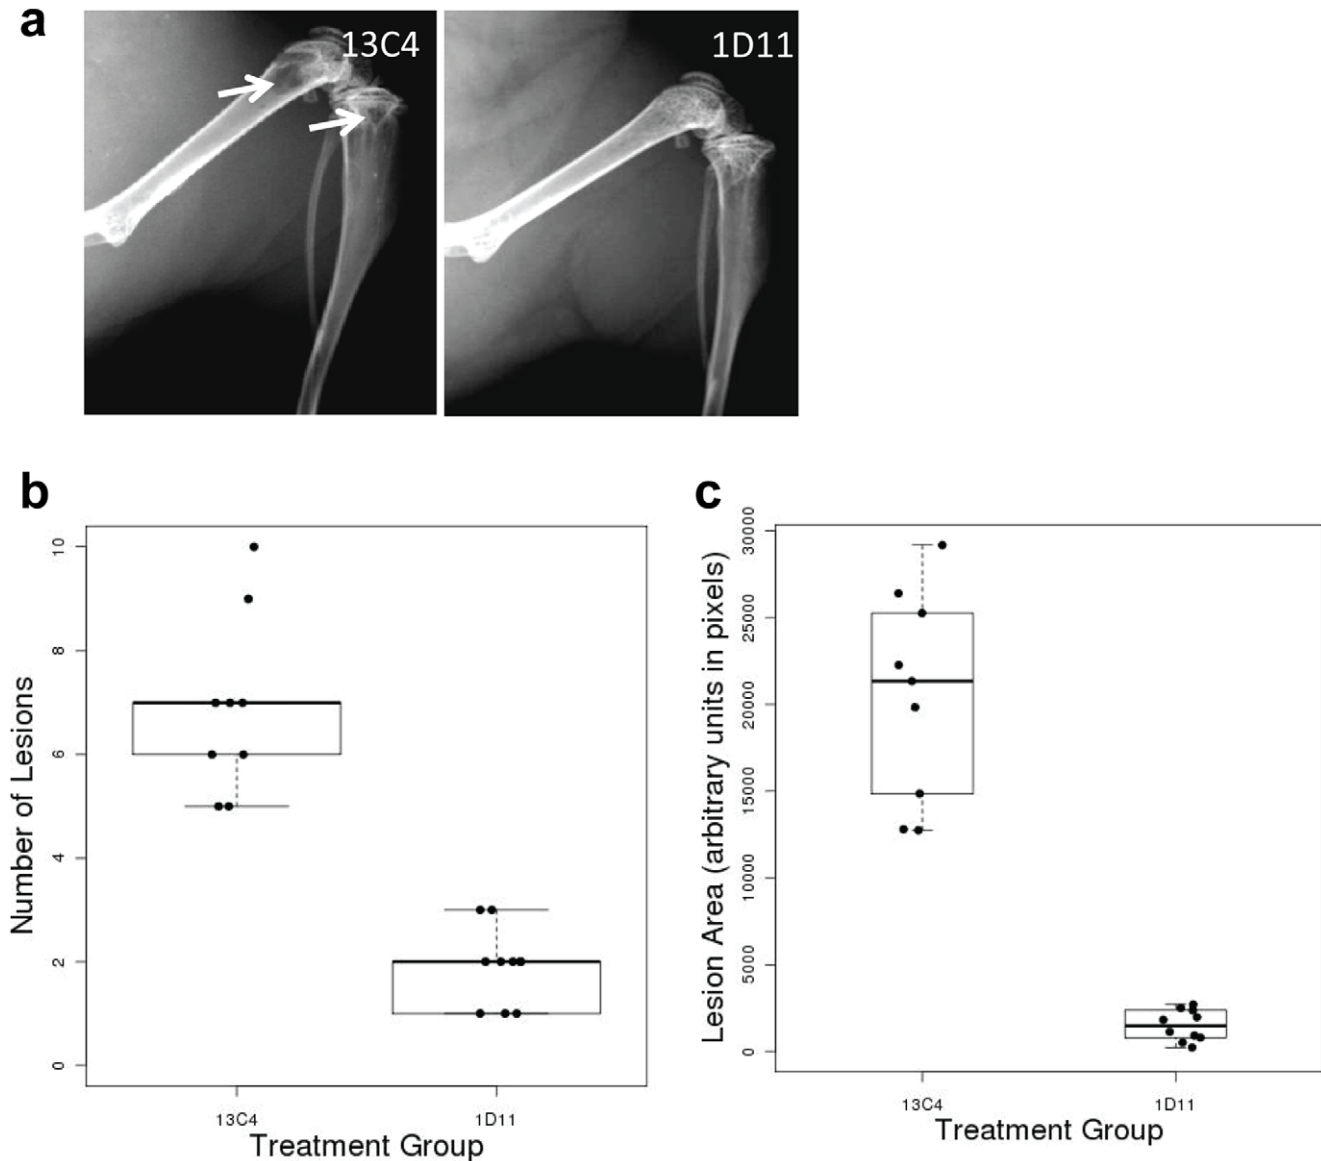

**Figure 2. Anti-TGF $\beta$  antibody reduces osteolytic lesions in MDA-MB-231 breast cancer bone metastasis cardiac injection model.** Mice were inoculated with MDA-MB-231 human breast cancer cells in the left cardiac ventricle and were treated with either isotype control (13C4, 10 mg/kg) or anti-TGF $\beta$  antibody (1D11, 10 mg/kg) for 4 weeks, starting from 1 day post tumor cell injection. At the end of the experiment, whole body X-ray images of mice from both control and anti-TGF $\beta$  antibody treated group were taken and osteolytic lesion area and osteolytic lesion counts were analyzed using image analysis software (Metamorph, Molecular Device). **Panel a:** Representative X-ray images of osteolytic bone lesions in the hind leg of mice treated for 4 weeks either with control antibody (13C4, left panel) or anti-TGF $\beta$  antibody (1D11, right panel). White arrows indicate presence of osteolytic lesions. **Panel b:** A boxplot representing the average lesion counts in mice inoculated with MDA-MB-231 cells in the left cardiac ventricle, treated with either control antibody (13C4, 10 mg/kg) or anti-TGF $\beta$  antibody (1D11, 10 mg/kg) for 4 weeks, starting 1 day after tumor cell injection shows decrease in lesion numbers after anti-TGF $\beta$  treatment ( $6.9 \pm 1.7$  for control and  $1.9 \pm 0.7$  for 1D11; Wilcoxon rank-sum p-value =  $<.001$ , N = 9). **Panel c:** A boxplot representing the lesion area from the same experiment shows decrease in the lesion area after anti-TGF $\beta$  treatment ( $20520 \pm 6000$  for control and  $1497 \pm 888$  for 1D11; Wilcoxon rank-sum p-value =  $<.001$ , N = at least 9). Lesion areas were measured using arbitrary pixel unit.

doi:10.1371/journal.pone.0027090.g002

reduce metastatic tumor burden related to breast cancers [31], [49]. Our data presented herein confirms these results in two preclinical breast cancers to bone metastases models and extends those to demonstrate that anti-TGF $\beta$  treatment increases mineralized matrix formation by osteoblasts as well as increases bone mass in preclinical bone metastasis models. Therapeutic approaches with a potential to maintain normal osteoblast

activities and reducing osteoclastic bone resorption represent a novel paradigm.

While several laboratories have tested the efficacy of the anti-TGF $\beta$  antibody against inhibition of tumor burden, much less has been reported on the possible efficacy of this agent toward new bone formation. In addition to histology and microCT analysis, we have used cutting-edge biochemical techniques to analyze the

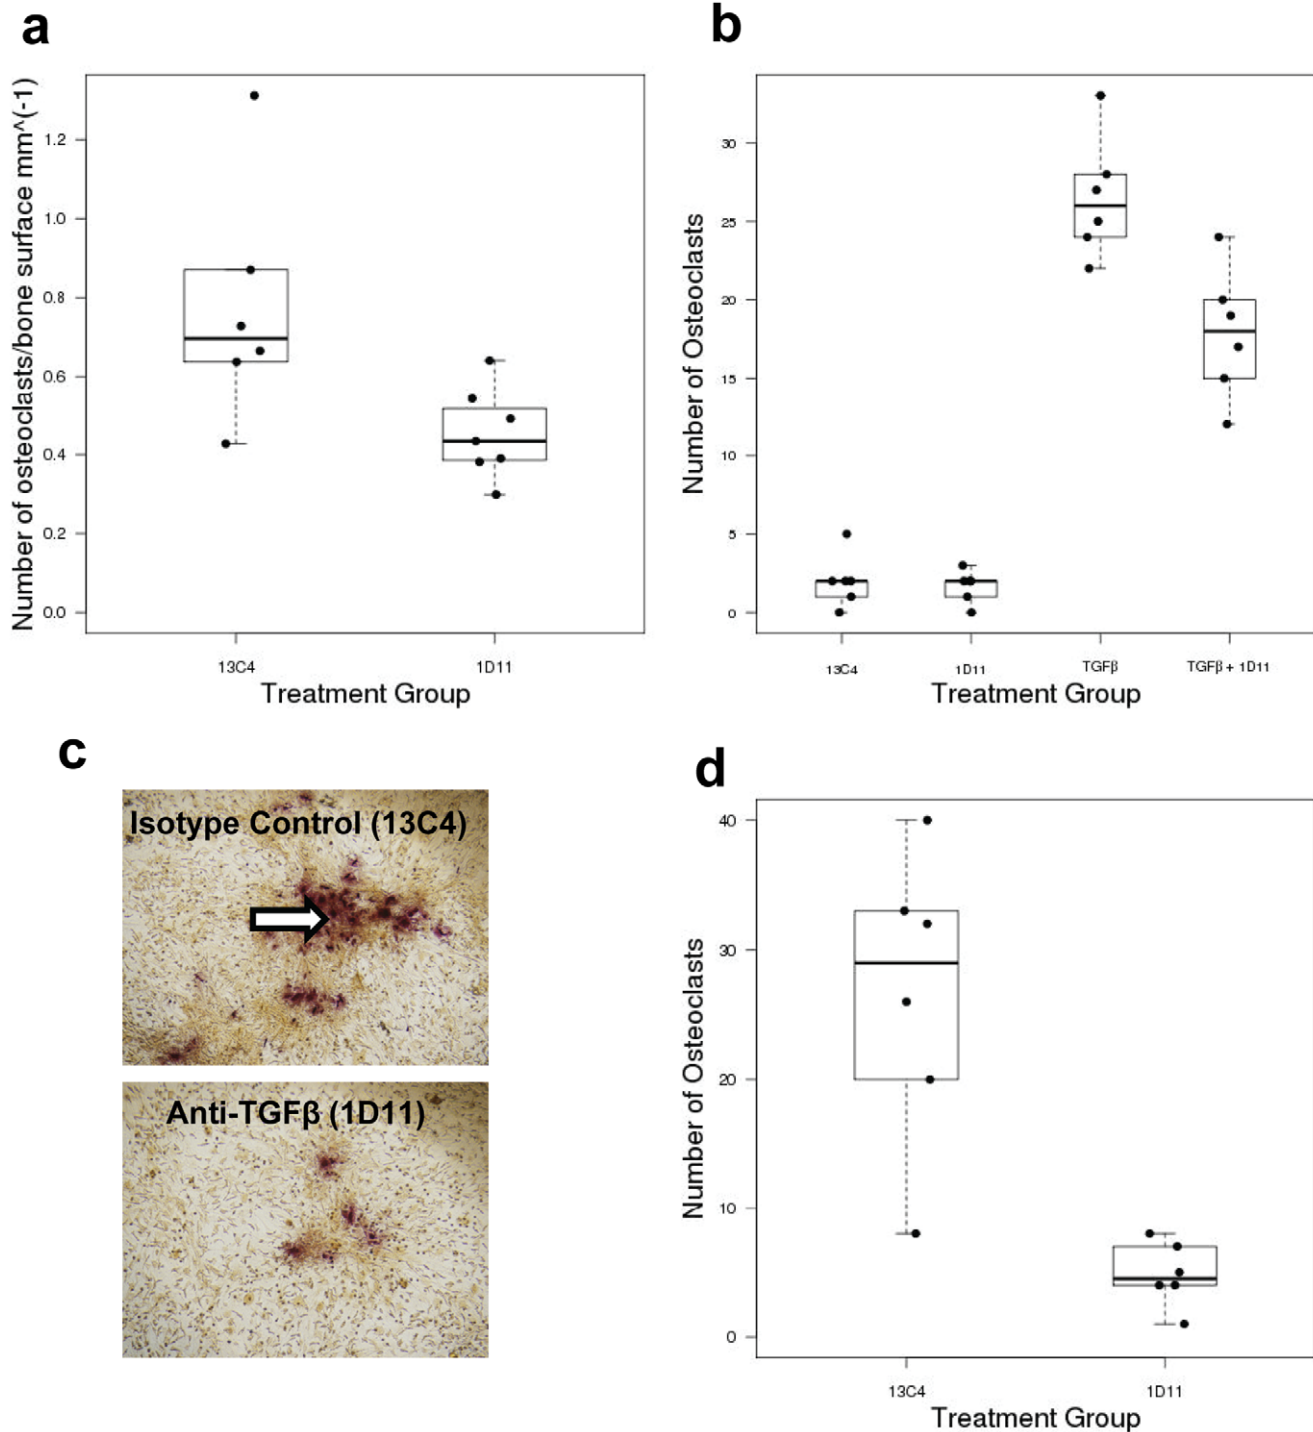

**Figure 3. Anti-TGF $\beta$  antibody decreased osteoclast numbers and *in vitro* osteoclastogenesis.** **Panel a:** Boxplot of number of TRAP positive osteoclasts per millimeter of bone surface in MBA-MB-231 tumor-bearing tibiae, showing significantly decreased osteoclasts upon 1D11 treatment, compared to 13C4. Wilcoxon rank-sum p-value = 0.027. Mean  $\pm$  standard deviation = 13C4:  $0.7733 \pm 0.3002$ , 1D11:  $0.4539 \pm 0.1141$ . N = at least 6). **Panel b:** To assess the effect of anti-TGF $\beta$  treatment directly on osteoclast population, an *ex vivo* osteoclastogenesis assay was performed using bone marrow mononuclear cells. Bone marrow mononuclear cells were isolated and cultured in presence of 13C4 (control antibody), 1D11 (anti-TGF $\beta$  antibody), TGF $\beta$ +13C4 or TGF $\beta$ +1D11 in presence of both RANKL and MCSF. Both 13C4 and 1D11 was used at a concentration of 25  $\mu\text{g}/\text{ml}$ . TGF $\beta$  as used at a concentration of 5 ng/ml. Osteoclasts were stained using a Leucocyte acid phosphatase (TRAP) kit as per manufacturer's instruction (Sigma-Aldrich) and TRAP positive cells (reddish brown) were counted under microscope. Boxplots of number of osteoclasts by group for osteoclastogenesis assay show that treatment with 1D11 significantly reduced TGF $\beta$ -mediated osteoclast formation. Wilcoxon rank-sum p-value for TGF $\beta$  and TGF $\beta$  + 1D11 groups is 0.01. Mean  $\pm$  standard deviation = TGF $\beta$ :  $26.5 \pm 3.83$ , TGF $\beta$  + 1D11:  $17.83 \pm 4.17$ . Data presented here is representative of two independent experiments. **Panel c:** To assess the effect of anti-TGF $\beta$  antibody on osteoblast-mediated osteoclastogenesis, bone marrow mononuclear cells were cultured on a layer of primary mouse calvarial osteoblasts in the presence of either control antibody (13C4) or the anti-TGF $\beta$  antibody (1D11). After 7–10 days, TRAP staining was performed to identify mature osteoclasts (indicated by arrow). **Panel d:** Osteoblast mediated osteoclastogenesis increases significantly upon 1D11 treatment compared to control, Wilcoxon rank-sum p-value = 0.006. Mean  $\pm$  standard deviation = 13C4:  $26.5 \pm 11.31$ , 1D11:  $4.83 \pm 2.48$ . Data presented here is representative of two independent experiments. doi:10.1371/journal.pone.0027090.g003



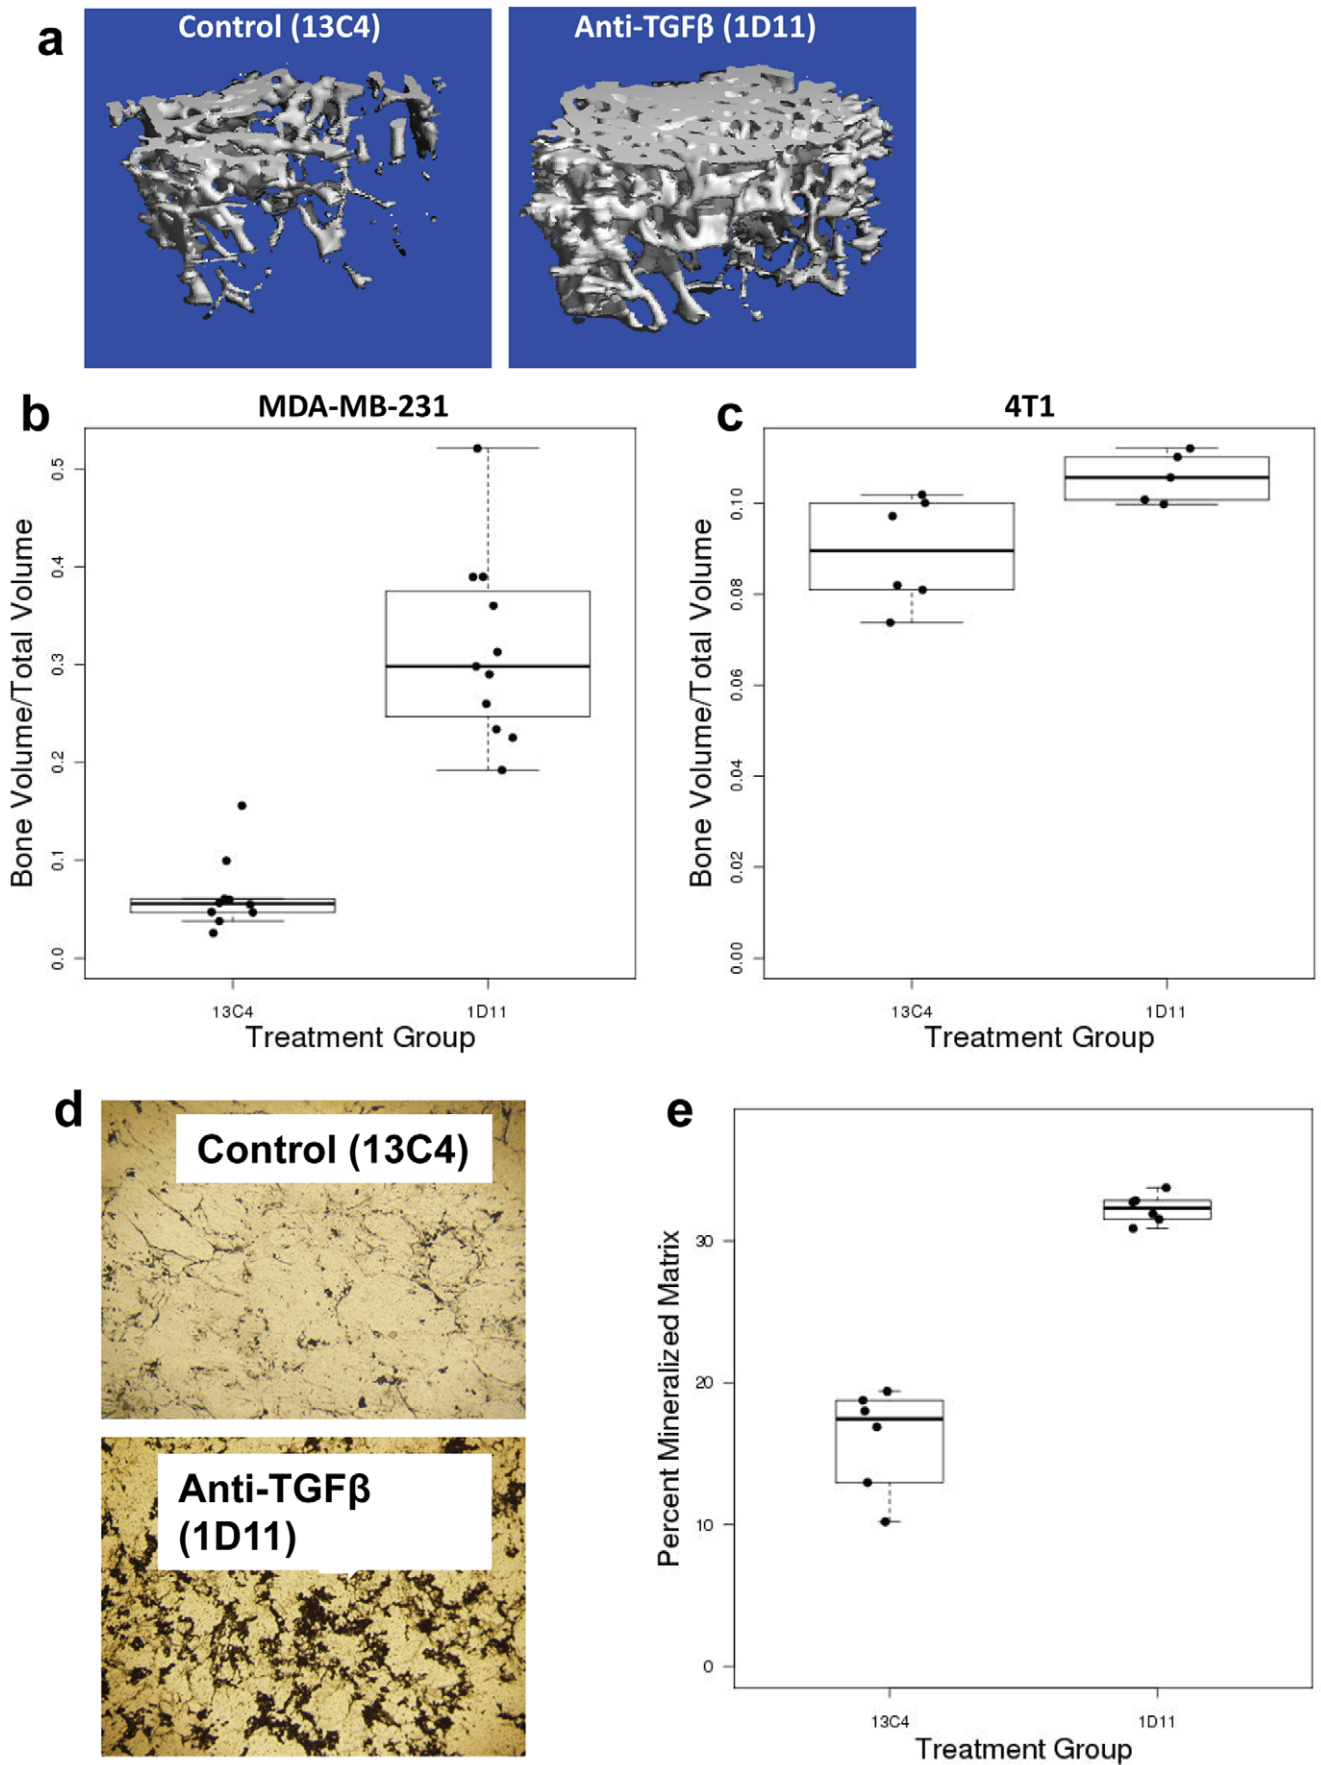

**Figure 4. Anti-TGFβ antibody increases bone volume in tumor bearing mice.** MDA-MB-231 cells were injected via intra-cardiac route in 4 week old female nude mice and 4T1 cells were injected in 4–5 week old female Balb/C mice. Mice were treated either with control antibody (13C4, 10 mg/kg) or anti-TGFβ antibody (1D11, 10 mg/kg) for 4 weeks, starting 1 day after tumor cell inoculation. Trabecular bone volume in the tibial metaphysis of tumor-bearing mice was analyzed by microCT. **Panel a:** Representative three dimensional reconstructions of microCT images from both 13C4 and 1D11 treated groups from mice injected with MDA-MB-231 cells. **Panel b:** Boxplots of average BV/TV (bone volume/total volume) by group for the MDA-MB-231 tumor-bearing mice show significant increase in bone mass after treatment with anti-TGFβ antibody. Wilcoxon rank-sum p-value = <0.001. Mean ± standard deviation = 13C4: 0.06±0.04, 1D11: 0.32±0.09. N = at least 10. **Panel c:** Boxplots of average BV/TV (bone volume/total volume) by group for the 4T1 tumor-bearing mice show a significant increase in bone mass as a result of treatment with 1D11 as measured by BV/TV. Wilcoxon rank-sum p-value = 0.036. Mean ± standard deviation = 13C4: 0.09±0.01, 1D11: 0.11±0.01, N = at least 5. **Panel d:** Mouse calvarial osteoblasts were isolated and cultured for 7–10 days as described in the Materials and Methods, either in presence of anti-TGFβ antibody (1D11) or isotype control (13C4) and mineralized matrix formation was measured using Von Kossa staining as a surrogate for osteoblast differentiation. **Panel e:** Boxplot analysis reveals treatment with anti-TGFβ antibody (1D11) significantly increased percent areas of mineralized matrix. Images were taken from representative fields and quantified using Metamorph software. Wilcoxon rank-sum p-value = 0.005. Mean ± standard deviation = 13C4: 16±3.7, 1D11: 32.3±1. Data presented here is representative of two independent experiments.

doi:10.1371/journal.pone.0027090.g004

**Table 1. Anti-TGFβ antibody improves trabecular architecture in tumor bearing mice tibia and femur.**

| Tibia                              | N  | 13C4 (N = 10)   | 1D11 (N = 11)   | p value   |
|------------------------------------|----|-----------------|-----------------|-----------|
| Bone Volume/Total Volume           | 21 | 0.064±0.037     | 0.316±0.095     | p<0.001   |
| ConnD mm <sup>-3</sup>             | 21 | 40.414±42.618   | 277.836±73.712  | p<0.001   |
| SMI                                | 21 | 2.788±0.355     | 0.701±0.946     | p<0.001   |
| Tb.N mm <sup>-1</sup>              | 21 | 2.699±0.69      | 6.553±1.1       | p<0.001   |
| Tb.Th mm                           | 21 | 0.044±0.004     | 0.058±0.007     | p<0.001   |
| Tb.Sp mm                           | 21 | 0.396±0.098     | 0.146±0.03      | p<0.001   |
| Tissue MineralDensity (mgHA/cm3)   | 21 | 1031.672±43.286 | 1008.325±24.358 | p = 0.091 |
| Femur                              | N  | 13C4 (N = 9)    | 1D11 (N = 6)    | p value   |
| Bone Volume/Total Volume           | 15 | 0.073±0.043     | 0.247±0.08      | p = 0.002 |
| ConnD mm <sup>-3</sup>             | 15 | 60.685±43.046   | 207.442±83.689  | p = 0.003 |
| SMI                                | 15 | 2.778±0.455     | 1.364±0.645     | p = 0.002 |
| Tb.N mm <sup>-1</sup>              | 15 | 2.99±0.756      | 5.371±0.939     | p = 0.002 |
| Tb.Th mm                           | 15 | 0.046±0.004     | 0.057±0.004     | p = 0.002 |
| Tb.Sp mm                           | 15 | 0.353±0.069     | 0.187±0.035     | p = 0.002 |
| Tissue Mineral Density (mg HA/cm3) | 15 | 977.687±40.562  | 985.161±20.43   | p = 0.814 |

MicroCT analysis of the tibiae from MDA-MB-231 tumor-bearing mice treated for 4 weeks, starting one day after tumor cell inoculation, revealed that suppression of TGFβ by the antibody 1D11 increased trabecular bone volume through increases in trabecular number, and this improved the connectivity of the trabeculae (lack of fenestrations), compared to isotype control. Wilcoxon rank-sum test was used for this analysis. Means and standard deviations by group for the MDA-MB-231 four week data with p-values from Wilcoxon rank-sum tests. Quantitative analysis of microCT data from MDA-MB-231 tumor-bearing mice treated with 13C4 or 1D11 for weeks. Trabecular bone volume (BV/TV), trabecular thickness (Tb.Th\*), trabecular number (Tb.N\*), and connectivity density (Conn.D), and mean volumetric density of the mineralized tissue (Tb.TMD) were calculated using the Scanco evaluation software.

doi:10.1371/journal.pone.0027090.t001

**Table 2. Suppression of TGFβ by anti-TGFβ antibody 1D11 increased the mineral-to-collagen ratio.**

|                           | 13C4          | 1D11          | % change | p-value |
|---------------------------|---------------|---------------|----------|---------|
| Mineral-to-collagen ratio | 18.7±2.2      | 20.8±2.1      | 11.2     | 0.0287  |
| Carbonate substitution    | 0.134±0.01    | 0.137±0.009   | 2.3      | 0.4417  |
| Crystallinity             | 0.0463±0.0005 | 0.0461±0.0005 | -0.3     | 0.5623  |

Confocal raman spectroscopy was performed on mice bearing MDA-MB-231 tumors in bone treated for 4 weeks with 1D11 or 13C4 antibodies as described in materials and methods section. At least nine spectra were analyzed per specimen and the mean mineral-to-collagen ratio, Type-B carbonate substitution, and crystallinity were scored. Both mineral-to-collagen ratio and carbonate substitution increased significantly upon 1D11 treatments compared to control. Mean ± standard deviation is shown, p value was determined using Wilcoxon test.

doi:10.1371/journal.pone.0027090.t002

composition of the bone in the tumor-bearing animals. We have previously reported that in normal murine bone, anti-TGFβ treatment increases the number of osteoblasts and decreases the number of osteoclasts, thereby increasing the overall bone mass [35]. In agreement with this, similar findings were noted by other groups using a small-molecule inhibitor of TGFβ receptor kinase, SD208, suggesting that blocking excess TGFβ is overall beneficial to the bone [33,50]. Although the number of osteoblasts and osteoclasts is critical in maintaining bone remodeling, healthy bone formation also depends on the normal functioning of these cell types. The amount of bone is not always the exact measure of whether bone tissue is healthy and capable of normal load bearing involved in everyday activities. Of note, patients suffering from osteolytic bone damage often present with pathological fracture at the time of diagnosis. The suppression of TGFβ signaling affected tissue-level properties, namely bone resorption and mineralization. By studying TGFβ1 transgenic mice, Balooch et al. [16] found that decrease in tissue modulus is a function of increased TGFβ signaling. Likewise, treating young mice (4 weeks of age) with a pharmacological inhibitor of the TGFβ type I receptor (TβRI

kinase for 6 weeks increased both the degree of mineralization, as determined by X-ray tomography, and elastic modulus of the tibia cortex, as determined by nanoindentation [33]. Similarly, the current study using tumor-bearing animals found that TGF $\beta$  suppression increased the Raman-derived measure of mineralization (mineral-to-collagen ratio). This suggests that an anti-TGF $\beta$  antibody may prevent, if not reverse, the negative effect of tumors on bone quality.

Our finding using tumor-bearing animals has revealed that anti-TGF $\beta$  treatment modulated both osteoclast and osteoblast cell compartments, making this therapy more appealing for rescuing bone loss in osteolytic tumor models. We have demonstrated that anti-TGF $\beta$  antibody treatment inhibits osteoclast formation *in vivo*. In addition, a direct negative effect on osteoclast formation was demonstrated using bone marrow mononuclear cells. Of note, we have previously reported that in normal bone, there is almost 50% decrease in number of osteoclasts in 1D11-treated mice [35]. In addition to the direct effect on both osteoblasts and osteoclasts, osteoblast-mediated osteoclastogenesis was also inhibited using this approach. Much focus has been given to develop therapies directed to inhibition of osteoclastic bone resorption to prevent osteolytic bone damage. In osteolytic bone disease, osteoblast differentiation is often suppressed [51]. It has been reported that TGF $\beta$  modulates osteoblast differentiation [52]. Using an *ex vivo* assay, we have demonstrated that 1D11 antibody treatment increases mineralized matrix formation by calvarial osteoblasts, compared to the control antibody, which may likely contribute to an increase in the bone mass. In addition to make new bones, osteoblasts also maintain the homeostasis of osteoclast formation in the bone. Using a co-culture assay system, we have also demonstrated osteoblast-mediated osteoclastogenesis was inhibited by anti-TGF $\beta$  treatment. This emphasizes an indirect yet very important role for osteoblasts in affecting osteolytic bone damage.

## References

- Hortobagyi GN, Piccart-Gebhart MJ (1996) Current management of advanced breast cancer. *Semin Oncol* 23: 1–5.
- Theriault RL, Lipton A, Hortobagyi GN, Leff R, Gluck S, et al. (1999) Pamidronate reduces skeletal morbidity in women with advanced breast cancer and lytic bone lesions: a randomized, placebo-controlled trial. *Protocol 18 Aredia Breast Cancer Study Group*. *J Clin Oncol* 17: 846–854.
- Coleman RE, Lipton A, Roodman GD, Guise TA, Boyce BF, et al. Metastasis and bone loss: advancing treatment and prevention. *Cancer Treat Rev* 36: 615–620.
- Mundy GR (2002) Metastasis to bone: causes, consequences and therapeutic opportunities. *Nat Rev Cancer* 2: 584–593.
- Hortobagyi GN, Theriault RL, Porter L, Blayney D, Lipton A, et al. (1996) Efficacy of pamidronate in reducing skeletal complications in patients with breast cancer and lytic bone metastases. *Protocol 19 Aredia Breast Cancer Study Group*. *N Engl J Med* 335: 1785–1791.
- Kanis JA, McCloskey EV (2000) Bisphosphonates in multiple myeloma. *Cancer* 88: 3022–3032.
- Berenson JR, Lipton A (1998) Use of bisphosphonates in patients with metastatic bone disease. *Oncology (Williston Park)* 12: 1573–1579; discussion 1579–1581.
- Berenson JR, Rosen LS, Howell A, Porter L, Coleman RE, et al. (2001) Zoledronic acid reduces skeletal-related events in patients with osteolytic metastases. *Cancer* 91: 1191–1200.
- Djulbegovic B, Wheatley K, Ross J, Clark O, Bos G, et al. (2002) Bisphosphonates in multiple myeloma. *Cochrane Database Syst Rev*: CD 003188.
- Rosen LS, Gordon D, Kaminski M, Howell A, Belch A, et al. (2003) Long-term efficacy and safety of zoledronic acid compared with pamidronate disodium in the treatment of skeletal complications in patients with advanced multiple myeloma or breast carcinoma: a randomized, double-blind, multicenter, comparative trial. *Cancer* 98: 1735–1744.
- Stopeck AT, Lipton A, Body JJ, Steger GG, Tonkin K, et al. Denosumab compared with zoledronic acid for the treatment of bone metastases in patients with advanced breast cancer: a randomized, double-blind study. *J Clin Oncol* 28: 5132–5139.
- Mundy GR, Edwards JR (2008) PTH-related peptide (PTHrP) in hypercalcemia. *J Am Soc Nephrol* 19: 672–675.
- Mundy GR, Guise TA (1997) Hypercalcemia of malignancy. *Am J Med* 103: 134–145.
- Jemal A, Siegel R, Xu J, Ward E (2010) Cancer statistics, 2010. *CA Cancer J Clin* 60: 277–300.
- Jemal A, Center MM, DeSantis C, Ward EM. Global patterns of cancer incidence and mortality rates and trends. *Cancer Epidemiol Biomarkers Prev* 19: 1893–1907.
- Balooch G, Balooch M, Nalla RK, Schilling S, Filvaroff EH, et al. (2005) TGF-beta regulates the mechanical properties and composition of bone matrix. *Proc Natl Acad Sci U S A* 102: 18813–18818.
- Geiser AG, Zeng QQ, Sato M, Helvering LM, Hirano T, et al. (1998) Decreased bone mass and bone elasticity in mice lacking the transforming growth factor-beta 1 gene. *Bone* 23: 87–93.
- Erlebacher A, Derynck R (1996) Increased expression of TGF-beta 2 in osteoblasts results in an osteoporosis-like phenotype. *J Cell Biol* 132: 195–210.
- Borton AJ, Frederick JP, Datto MB, Wang XF, Weinstein RS (2001) The loss of Smad3 results in a lower rate of bone formation and osteopenia through dysregulation of osteoblast differentiation and apoptosis. *J Bone Miner Res* 16: 1754–1764.
- Yang X, Chen L, Xu X, Li C, Huang C, et al. (2001) TGF-beta/Smad3 signals repress chondrocyte hypertrophic differentiation and are required for maintaining articular cartilage. *J Cell Biol* 153: 35–46.
- Mundy GR (1997) Mechanisms of bone metastasis. *Cancer* 80: 1546–1556.
- Bierie B, Moses HL (2006) Tumour microenvironment: TGFbeta: the molecular Jekyll and Hyde of cancer. *Nat Rev Cancer* 6: 506–520.
- Yin JJ, Selander K, Chirgwin JM, Dallas M, Grubbs BG, et al. (1999) TGF-beta signaling blockade inhibits PTHrP secretion by breast cancer cells and bone metastases development. *J Clin Invest* 103: 197–206.
- Baselga J, Rothenberg ML, Tabernero J, Seoane J, Daly T, et al. (2008) TGF-beta signalling-related markers in cancer patients with bone metastasis. *Biomarkers* 13: 217–236.
- Sterling JA, Oyajobi BO, Grubbs B, Padalecki SS, Munoz SA, et al. (2006) The hedgehog signaling molecule Gli2 induces parathyroid hormone-related peptide expression and osteolysis in metastatic human breast cancer cells. *Cancer Res* 66: 7548–7553.
- Pfeilschifter J, Oechsner M, Naumann A, Gronwald RG, Minne HW, et al. (1990) Stimulation of bone matrix apposition *in vitro* by local growth factors: a comparison between insulin-like growth factor I, platelet-derived growth factor, and transforming growth factor beta. *Endocrinology* 127: 69–75.

## Acknowledgments

The authors thank Mr. Steve Munoj and Ms Elizabeth McQuinn for their contribution in obtaining the data.

## Author Contributions

Conceived and designed the experiments: SB JSN GRM. Performed the experiments: SB JSN AC AA TR. Analyzed the data: SB JSN JA YS AC. Contributed reagents/materials/analysis tools: JA JSN DSP SL RJ JS JE. Wrote the paper: SB JSN JS LMM.

27. Mundy GR, Varani J, Orr W, Gondek MD, Ward PA (1978) Resorbing bone is chemotactic for monocytes. *Nature* 275: 132–135.
28. Alliston T, Choy L, Ducy P, Karsenty G, Derynck R (2001) TGF-beta-induced repression of CBFA1 by Smad3 decreases cbfa1 and osteocalcin expression and inhibits osteoblast differentiation. *EMBO J* 20: 2254–2272.
29. Yingling JM, Blanchard KL, Sawyer JS (2004) Development of TGF-beta signalling inhibitors for cancer therapy. *Nat Rev Drug Discov* 3: 1011–1022.
30. Yang YA, Dukhanina O, Tang B, Mamura M, Letterio JJ, et al. (2002) Lifetime exposure to a soluble TGF-beta antagonist protects mice against metastasis without adverse side effects. *J Clin Invest* 109: 1607–1615.
31. Nam JS, Terabe M, Mamura M, Kang MJ, Chae H, et al. (2008) An anti-transforming growth factor beta antibody suppresses metastasis via cooperative effects on multiple cell compartments. *Cancer Res* 68: 3835–3843.
32. Bandyopadhyay A, Aguin JK, Wang L, Tang Y, Lei X, et al. (2006) Inhibition of pulmonary and skeletal metastasis by a transforming growth factor-beta type I receptor kinase inhibitor. *Cancer Res* 66: 6714–6721.
33. Mohammad KS, Javelaud D, Fournier PG, Niewolna M, McKenna CR, et al. (2011) TGF-beta-RI kinase inhibitor SD-208 reduces the development and progression of melanoma bone metastases. *Cancer Res* 71: 175–184.
34. Mohammad KS, Chen CG, Balooch G, Stebbins E, McKenna CR, et al. (2009) Pharmacologic inhibition of the TGF-beta type I receptor kinase has anabolic and anti-catabolic effects on bone. *PLoS One* 4: e5275.
35. Edwards JR, Nyman JS, Lwin ST, Moore MM, Esparza J, et al. (2010) Inhibition of TGF-beta signaling by 1D11 antibody treatment increases bone mass and quality in vivo. *J Bone Miner Res* 25: 2419–2426.
36. Dasch JR, Pace DR, Waegell W, Inenaga D, Ellingsworth L (1989) Monoclonal antibodies recognizing transforming growth factor-beta. Bioactivity neutralization and transforming growth factor beta 2 affinity purification. *J Immunol* 142: 1536–1541.
37. Khanna AK, Plummer MS, Hilton G, Pieper GM, Ledbetter S (2004) Anti-transforming growth factor antibody at low but not high doses limits cyclosporine-mediated nephrotoxicity without altering rat cardiac allograft survival: potential of therapeutic applications. *Circulation* 110: 3822–3829.
38. Ling H, Li X, Jha S, Wang W, Karetzky L, et al. (2003) Therapeutic role of TGF-beta-neutralizing antibody in mouse cyclosporin A nephropathy: morphologic improvement associated with functional preservation. *J Am Soc Nephrol* 14: 377–388.
39. Guise TA, Yin JJ, Taylor SD, Kumagai Y, Dallas M, et al. (1996) Evidence for a causal role of parathyroid hormone-related protein in the pathogenesis of human breast cancer-mediated osteolysis. *J Clin Invest* 98: 1544–1549.
40. Aslakson CJ, Miller FR (1992) Selective events in the metastatic process defined by analysis of the sequential dissemination of subpopulations of a mouse mammary tumor. *Cancer Res* 52: 1399–1405.
41. Michigami T, Hiraga T, Williams PJ, Niewolna M, Nishimura R, et al. (2002) The effect of the bisphosphonate ibandronate on breast cancer metastasis to visceral organs. *Breast Cancer Res Treat* 75: 249–258.
42. Gallwitz WE, Guise TA, Mundy GR (2002) Guanosine nucleotides inhibit different syndromes of PTHrP excess caused by human cancers in vivo. *J Clin Invest* 110: 1559–1572.
43. Robey PG, Termine JD (1985) Human bone cells in vitro. *Calcif Tissue Int* 37: 453–460.
44. Karsenty G, Wagner EF (2002) Reaching a genetic and molecular understanding of skeletal development. *Dev Cell* 2: 389–406.
45. Lacey DL, Timms E, Tan HL, Kelley MJ, Dunstan CR, et al. (1998) Osteoprotegerin ligand is a cytokine that regulates osteoclast differentiation and activation. *Cell* 93: 165–176.
46. Bucay N, Sarosi I, Dunstan CR, Morony S, Tarpley J, et al. (1998) osteoprotegerin-deficient mice develop early onset osteoporosis and arterial calcification. *Genes Dev* 12: 1260–1268.
47. Yasuda H, Shima N, Nakagawa N, Yamaguchi K, Kinosaki M, et al. (1998) Osteoclast differentiation factor is a ligand for osteoprotegerin/osteoclastogenesis-inhibitory factor and is identical to TRANCE/RANKL. *Proc Natl Acad Sci U S A* 95: 3597–3602.
48. Wada T, Nakashima T, Hiroshi N, Penninger JM (2006) RANKL-RANK signaling in osteoclastogenesis and bone disease. *Trends Mol Med* 12: 17–25.
49. Ganapathy V, Ge R, Grazioli A, Xie W, Banach-Petrosky W, et al. (2010) Targeting the Transforming Growth Factor-beta pathway inhibits human basal-like breast cancer metastasis. *Mol Cancer* 9: 122.
50. Dunn LK, Mohammad KS, Fournier PG, McKenna CR, Davis HW, et al. (2009) Hypoxia and TGF-beta drive breast cancer bone metastases through parallel signaling pathways in tumor cells and the bone microenvironment. *PLoS One* 4: e6896.
51. Stewart AF, Vignery A, Silverglate A, Ravin ND, LiVolsi V, et al. (1982) Quantitative bone histomorphometry in humoral hypercalcemia of malignancy: uncoupling of bone cell activity. *J Clin Endocrinol Metab* 55: 219–227.
52. Harris SE, Bonewald LF, Harris MA, Sabatini M, Dallas S, et al. (1994) Effects of transforming growth factor beta on bone nodule formation and expression of bone morphogenetic protein 2, osteocalcin, osteopontin, alkaline phosphatase, and type I collagen mRNA in long-term cultures of fetal rat calvarial osteoblasts. *J Bone Miner Res* 9: 855–863.
